# Supplementary material for: Targeting SIRT2 Sensitizes Melanoma Cells to Cisplatin via an EGFR-Dependent Mechanism
Source: MDPI journal article supplement (doi:10.3390/ijms22095034), 2021-05-10
Supplement: s1 [file s1]

# Targeting SIRT2 sensitizes melanoma cells to cisplatin via an EGFR-dependent mechanism.

Iwona Karwaciak, Anna Sałkowska, Kaja Karaś, Jarosław Dastyh, and Marcin Ratajewski

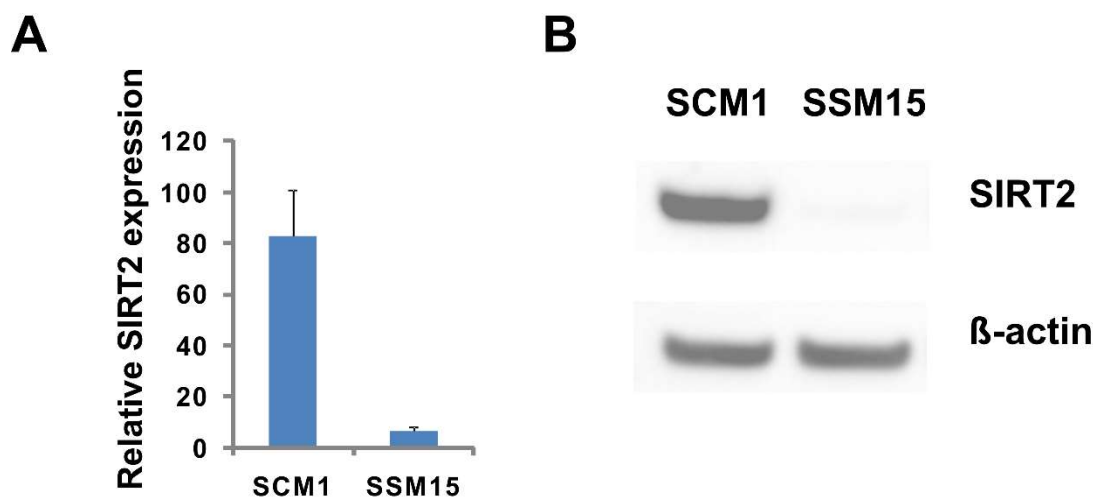

**Figure S1.** Analysis of SIRT2 expression in MDA-MB-435S cellular clones: SCM1 and SSM15. (A) Expression of mRNA of SIRT2 gene evidenced by real time RT-PCR, mean  $\pm$  SD, n = 3. (B) SIRT2 expression evidenced by Western blotting.

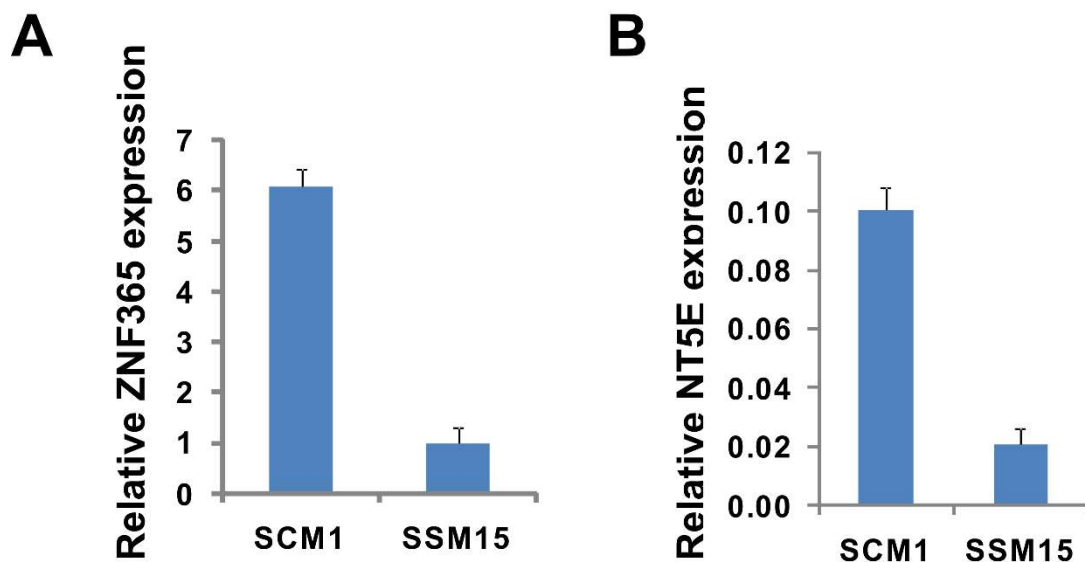

**Figure S2.** Analysis of expression of the genes involved in DNA repair in MDA-MB-435S cellular clones: SCM1 and SSM15. (A) *ZNF365* mRNA expression evidenced by real time RT-PCR, mean  $\pm$  SD, n = 3. (B) *NT5E* mRNA expression evidenced by real time RT-PCR, mean  $\pm$  SD, n = 3.

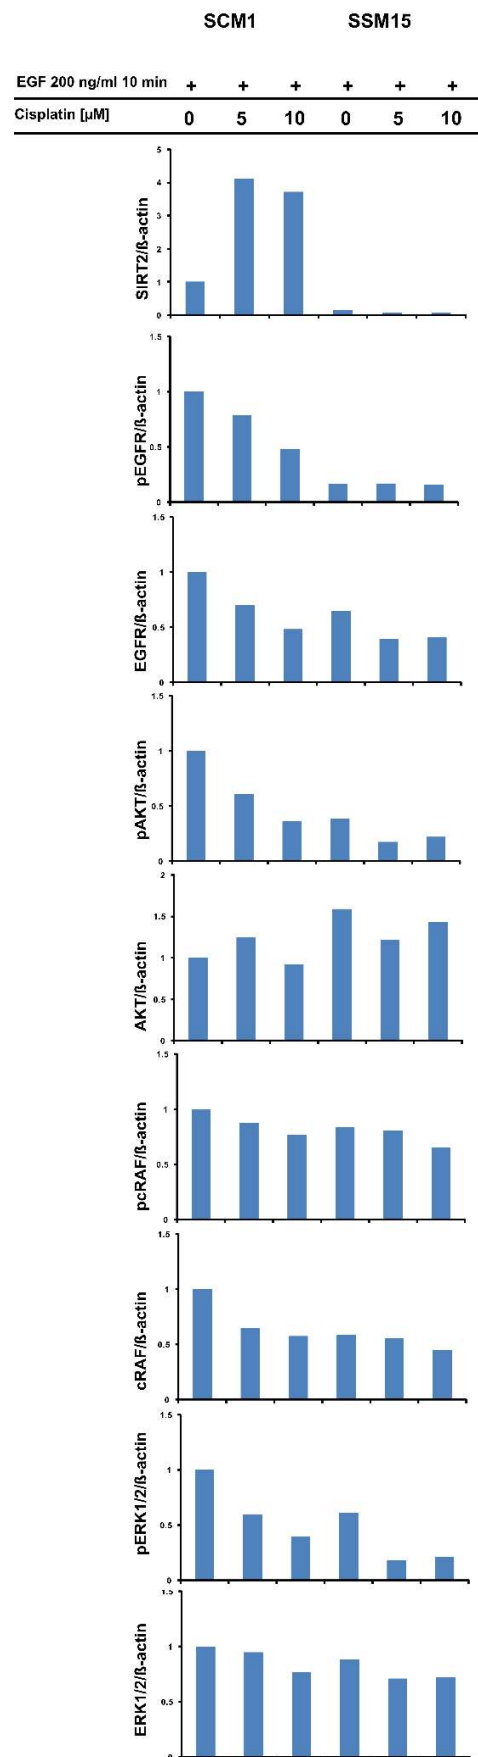

**Figure S3.** Results of densitometric analysis of the blots presented in Fig. 2. Blots were analyzed using SysTools from Syngene. .

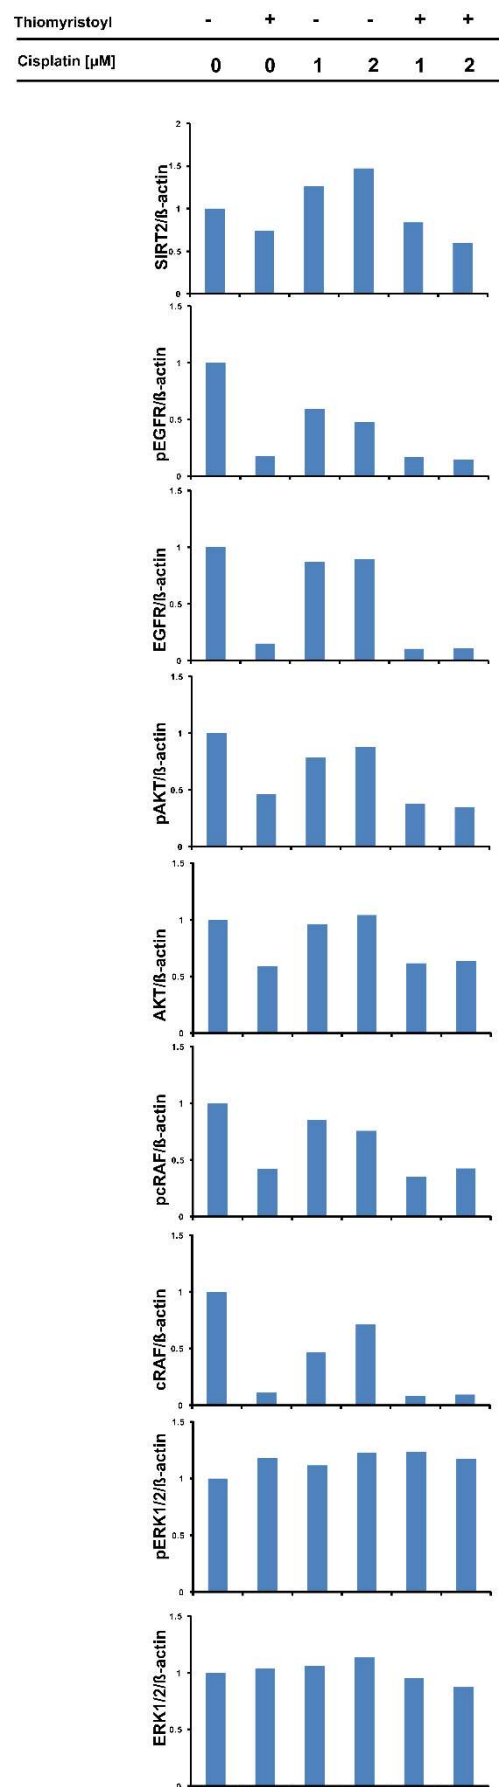

**Figure S4.** Results of densitometric analysis of the blots presented in Fig. 4. Blots were analyzed using SysTools from Syngene.
